# Supplementary material for: Computational analysis of congenital heart disease associated SNPs: Unveiling their impact on the gene regulatory system
Source: bioRxiv or medRxiv preprint supplement (doi:10.1101/2024.03.20.24304537), 2024-03-22
Supplement: Supplementary file [file media-13.pdf]

1 **A computational approach to study SNPs associated with congenital heart disease**

2

3 **Authors**

4 Shikha Vashisht<sup>1</sup>, Costantino Parisi<sup>1</sup>, Cecilia L. Winata<sup>1</sup>

5 **Author Affiliations**

6 <sup>1</sup> International Institute of Molecular and Cell Biology in Warsaw, Laboratory of Zebrafish  
7 Developmental Genomics, Księcia Trojdena 4, 02-109, Warsaw, Poland

8

9

10

11 **Supplementary Figures**

12

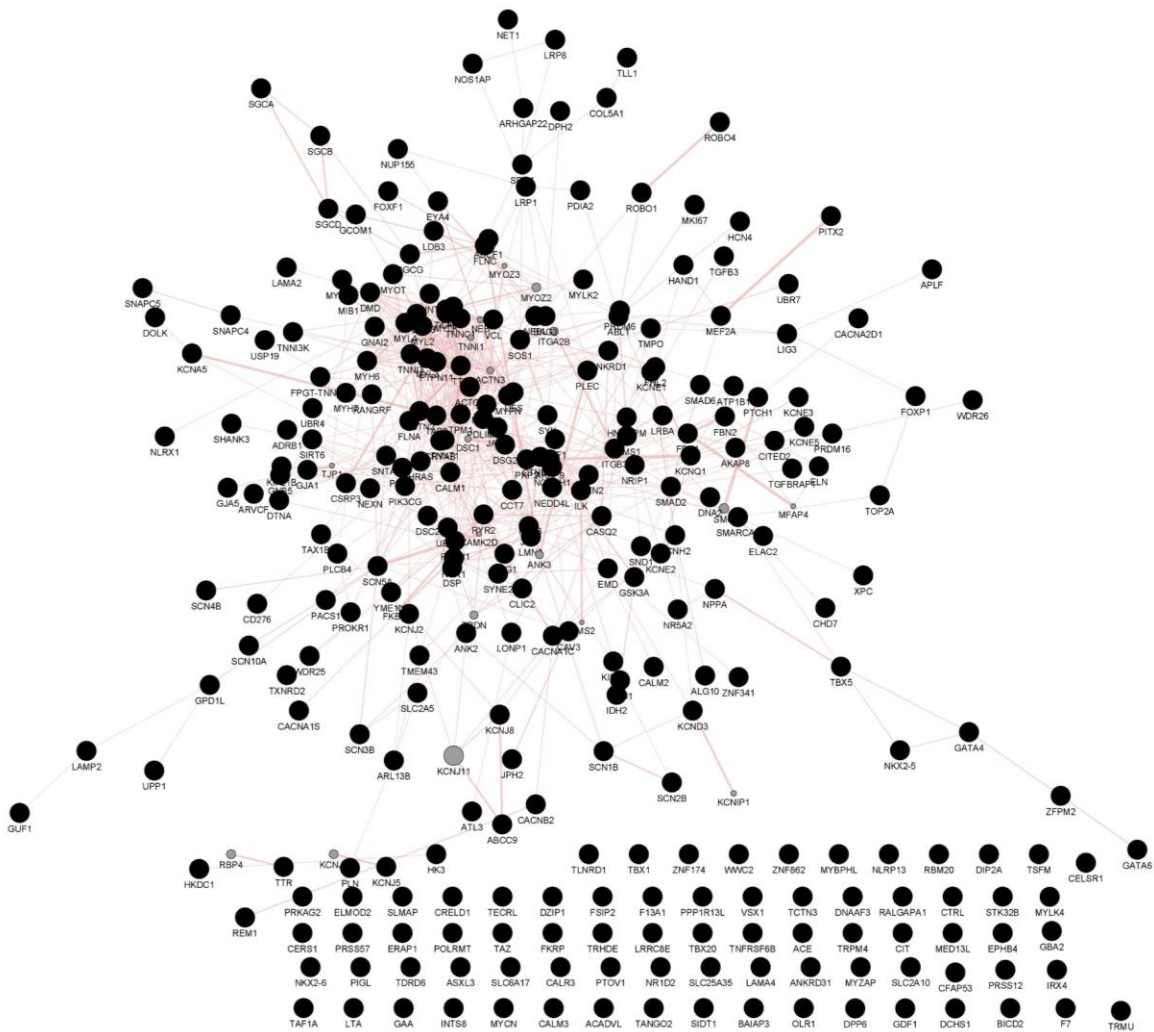

13

14 **S1\_Fig.** Protein-protein interaction network (PPIN). In the PPIN, *nodes* represent proteins containing

15 coding CHD-SNPs, and the *edges* signify interactions between physically interacting proteins. The

16 ‘black’ nodes correspond to query proteins and ‘grey’ nodes represent additional proteins in the

17 network identified in the GeneMania query search. The size of each 'grey' node is determined by the  
 18 gene score, reflecting the relatedness of these proteins according to GeneMANIA. Larger circles  
 19 indicate a stronger predicted connection between these proteins. Width of the edges signifies the  
 20 weight of interaction between proteins. Thicker edges indicate stronger physical interactions. The  
 21 network is constructed using the cytoscape-GeneMANIA module.

22  
 23

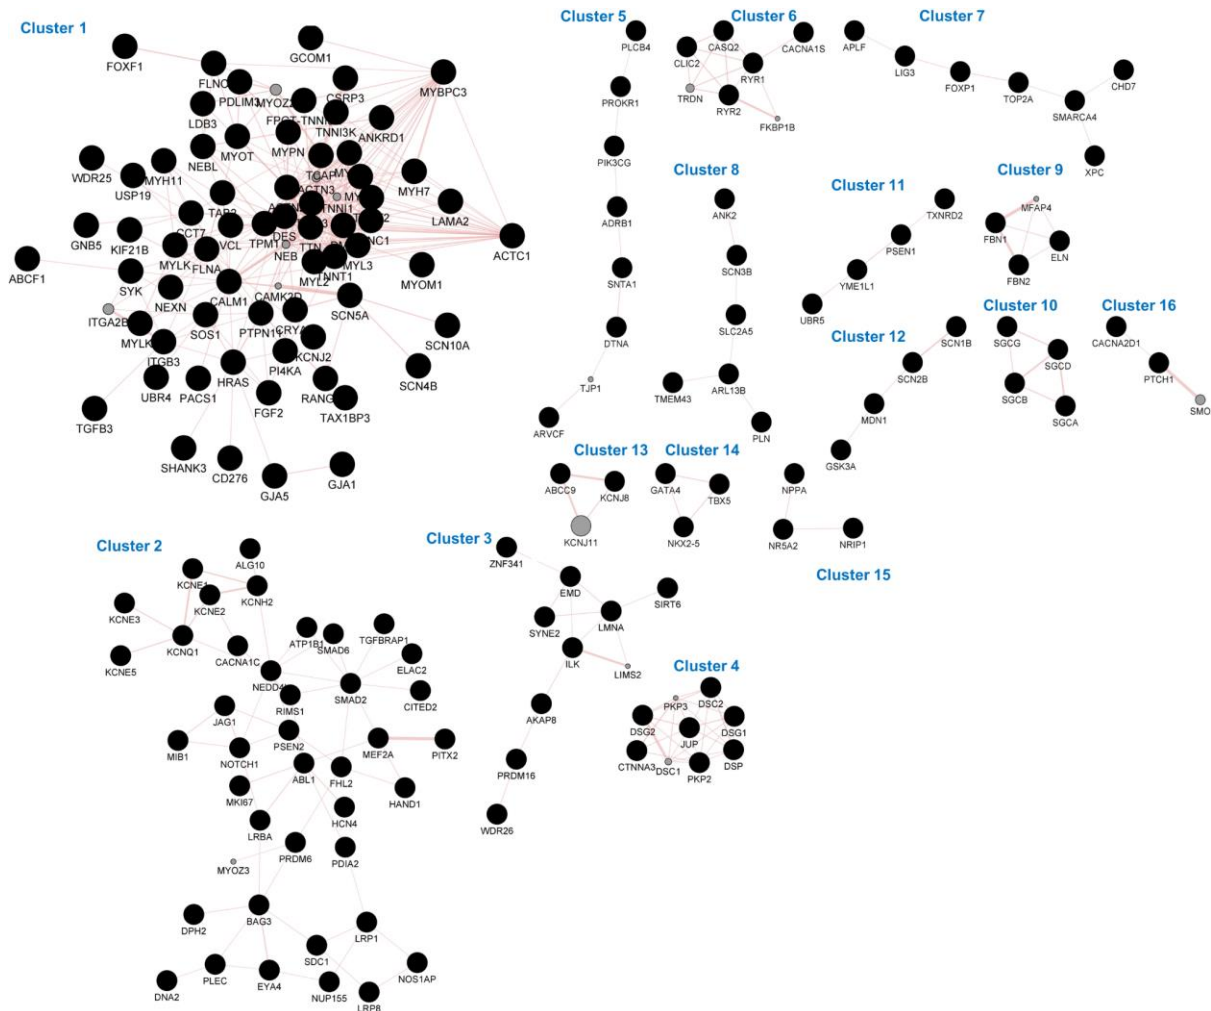

24  
 25

26 **S2\_Fig:** Clustering of protein-protein interaction network using MCL algorithm.

27 The figure comprises 16 distinct clusters numbered from 1 through 16. In this network, *nodes* represent  
 28 proteins containing coding CHD-SNPs, and the *edges* signify interactions between physically  
 29 interacting proteins.
